# Supplementary material for: A molecularly engineered, broad-spectrum anti-coronavirus lectin inhibits SARS-CoV-2 and MERS-CoV infection in vivo
Source: Research Square preprint supplement (doi:10.21203/rs.3.rs-516695/v1), 2021-05-17
Supplement: Supplementary file 1 [file f3457bfcaf56467414bad43e.pdf]

**Extended Data Fig. 1. The cytotoxicity of H84T-BanLec in different cell lines.** The cytotoxicity of H84T-BanLec in VeroE6, Huh7, BSC-1, HELF, and Calu-3 cells was evaluated using the CellTiterGlo® luminescent cell viability assay according to manufacturer's instructions. H84T-BanLec did not display any obvious cytotoxicity in any of these cell lines even at the concentration of 10 $\mu$ M (ie: 10,000nM).

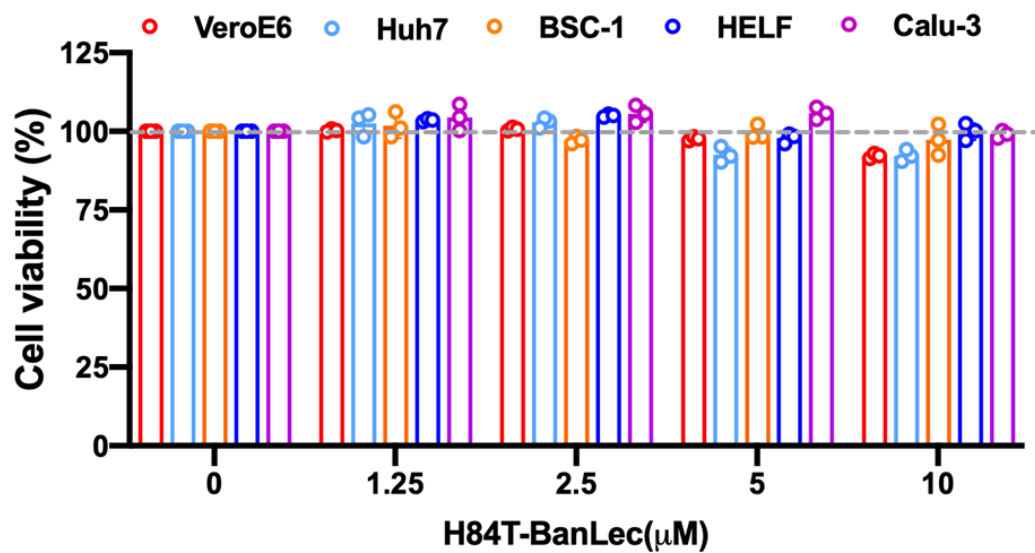

**Extended Data Fig. 2. Antiviral activity of H84T-BanLec against other human-pathogenic coronaviruses.** The antiviral activity of H84T-BanLec against SARS-CoV by **a**, plaque reduction assay and **b, (left)** viral load reduction assay; and **b, (right)** against HCoV-229E by viral load reduction assay.

**(a)**

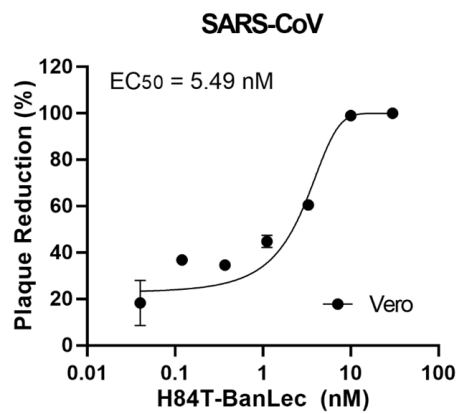

**(b)**

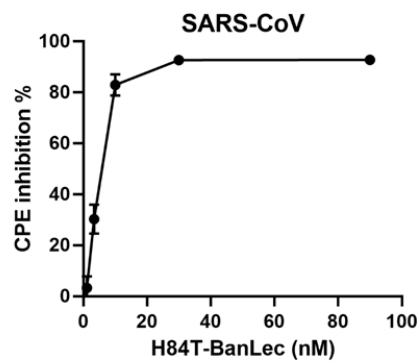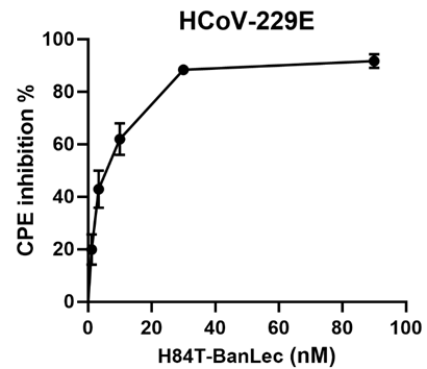

**Extended Data Fig. 3. Antiviral activity of H84T-BanLec against emerging SARS-CoV-2 variants.** The antiviral activity of H84T-BanLec against SARS-CoV-2 **a**, B.1.1.7 (with N501Y) and **b**, P.3 (with N501Y, E484K, and 141 to 143 deletion) variants were evaluated by **(left)** viral load reduction and **(right)** plaque reduction assays in VeroE6 cells. Data are mean  $\pm$  s.d.,  $n = 3$  biological replicates. One-way ANOVA. \*\*\* $P < 0.001$ , \*\* $P < 0.01$ , \* $P < 0.05$ .

(a)

#### SARS-CoV-2 (B.1.1.7 variant)

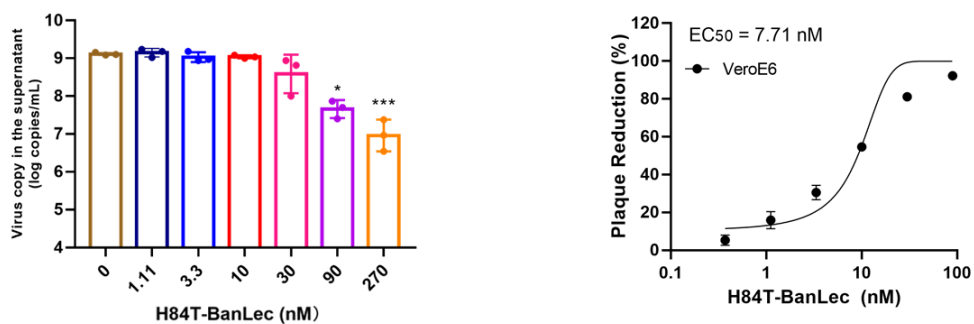

(b)

#### SARS-CoV-2 (P.3 variant)

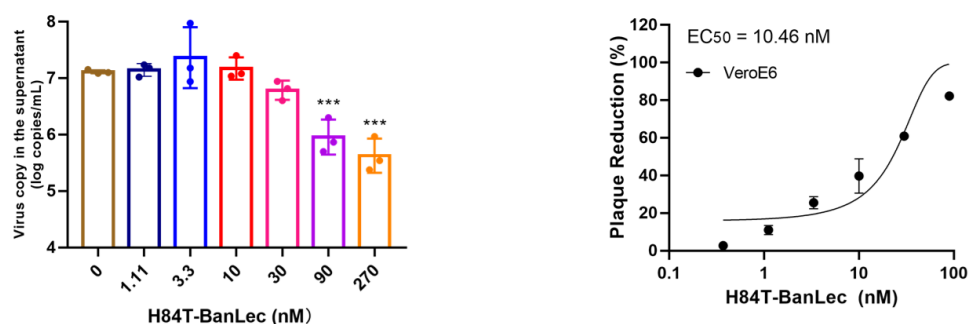

**Extended Data Fig. 4. H84T-BanLec targets virus internalization during coronavirus entry.** **a**, Time-of-drug-addition assay indicated that H84T-BanLec interfered with SARS-CoV-2 entry. **b**, Virus attachment and **c**, virus internalization assays showed that H84T-BanLec targeted the internalization rather than attachment to inhibit SARS-CoV-2 replication. Student's t-test.  $**P<0.01$ .

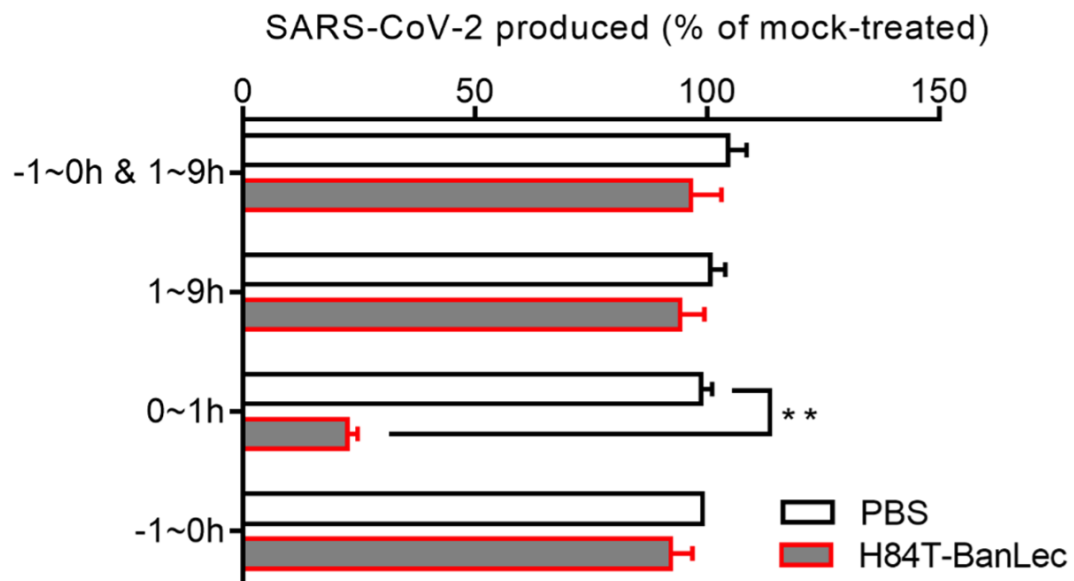

**Extended Data Fig. 5. Co-localization of H84T-BanLec with SARS-CoV-2 spike protein in the autopsied lung section of a deceased COVID-19 patient.** **Top,** Multiplex immunohistochemical analysis of SARS-CoV-2-infected autopsy lung section (SARS-CoV-2 nucleocapsid protein, yellow; SARS-CoV-2 spike protein, red; and H84T-BanLec, orange). Total original magnification 200 $\times$ . Sections were counterstained with DAPI to visualize nuclei (blue) and scanned using the Polaris Vectra multiplex spectral scanner. **Bottom,** The digital metadata were uploaded to FIJI for co-localization. The mean pixel intensity for each fluorochrome (0-256) at a particular centroid was plotted and the number of co-localizations calculated. The Pearson correlation calculation ranged from -1 to +1 and indicated inverse correlation (-1) through no correlation (0) to positive correlation (+1). The values calculated (0.6 and 0.58) for spike protein vs nucleocapsid protein and spike protein versus H84T-BanLec respectively represented high degrees of co-localization.

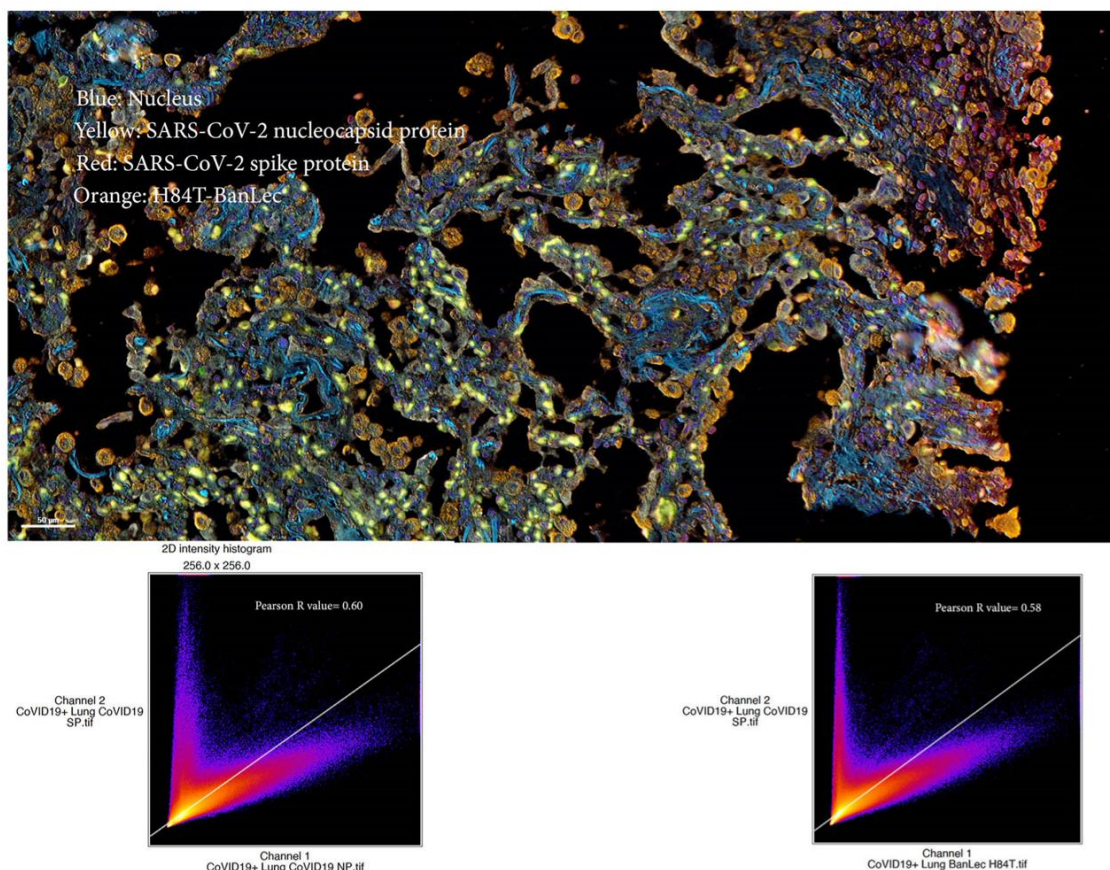

**Extended Data Fig. 6. Surface plasmon resonance (SPR) measurements.** H84T-BanLec was injected at the indicated concentrations to surfaces containing immobilized **a**, full-length trimeric N234Q spike mutant or **b**, receptor-binding domain to allow for binding (ascending parts), followed by wash out using buffer (descending parts). Data were fitted using the bivalent binding model, consistent with H84T-BanLec being predominantly a dimer.

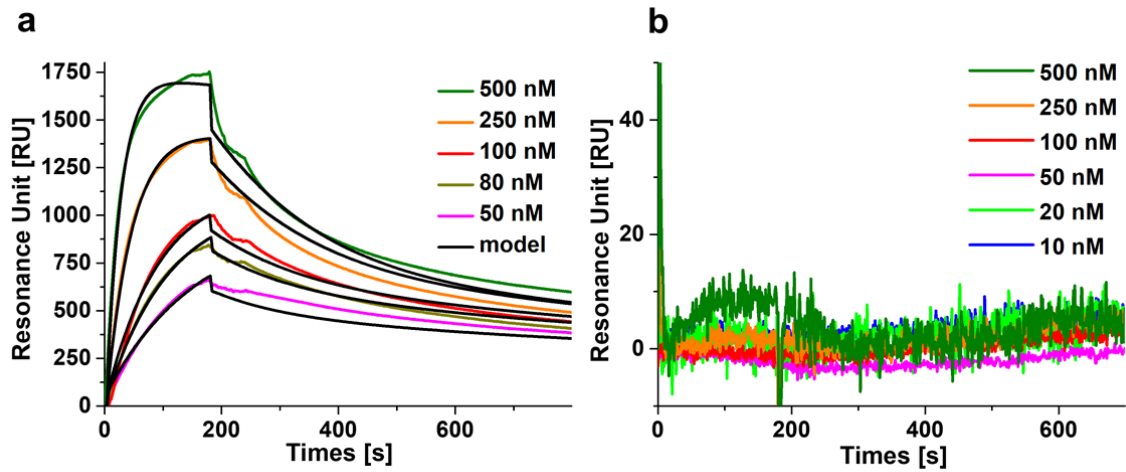

**Extended Data Fig. 7. Binding activity of SARS-CoV-2 spike protein to H84T-BanLec.** SARS-CoV-2 spike protein coupled to an AFM cantilever tip to the surface of VeroE6 cells in the presence of H84T-BanLec probed at the indicated concentrations in solution during single molecule force spectroscopy experiments. Measurements were done on at least 5 cells and at minimum 100 force-distance cycles were recorded on each cell at the respective H84T-BanLec concentrations. The binding activity was calculated from the fraction of force curves showing unbinding events. H84T-BanLec effectively blocks binding of SARS-CoV-2 spike protein to VeroE6 cells at 10nM concentration.

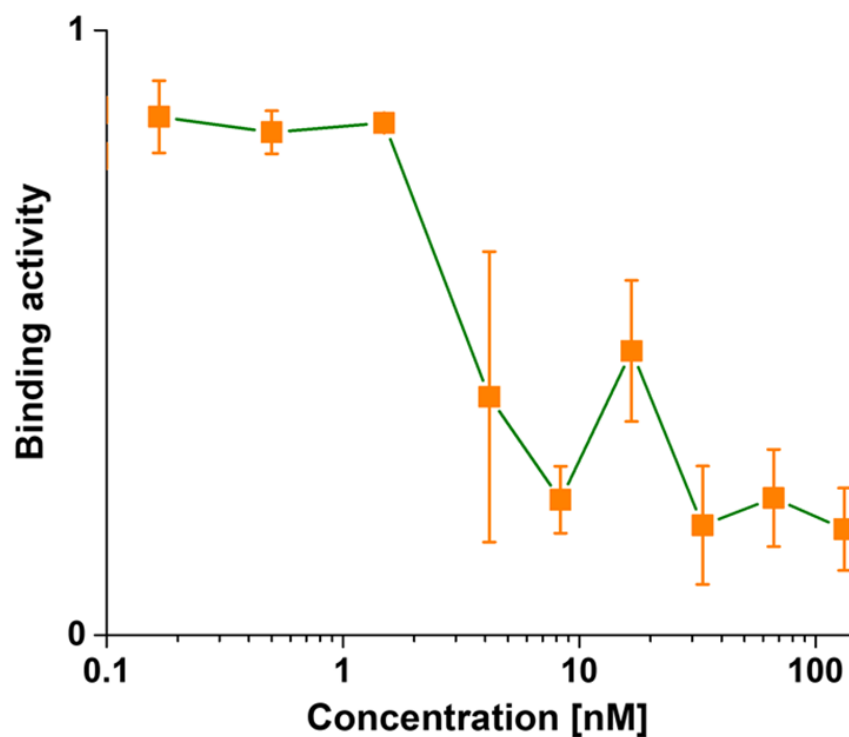

**Supplementary Table S1. Quantification of parameters obtained with dynamic force spectroscopy (DFS) and surface plasmon resonance (SPR) methods.**  $k_{on}$ ,  $k_{off}$ , and  $K_D$ , are kinetic on-rate, kinetic off-rate, and equilibrium dissociation constant, respectively, of a single bond (DFS) or the first binding step (SPR).  $X_\beta$  denotes the distance of the activation barrier from the energy minimum along the pulling axis in DFS experiments.

|                    | Dynamic Force Spectroscopy (DFS)              | Surface Plasmon Resonance (SPR)               |                                               |
|--------------------|-----------------------------------------------|-----------------------------------------------|-----------------------------------------------|
|                    | H84T-BanLec/Spike trimer                      | H84T-BanLec/Spike trimer                      | H84T-BanLec/N234Q spike mutant                |
| $k_{off, 1}$ [1/s] | $0.0457 \pm 0.024$                            | $0.0262 \pm 0.007$                            | $0.006 \pm 0.0027$                            |
| $k_{on, 1}$ [1/Ms] | $9.98 \times 10^4 \pm 5.18 \times 10^4$       | $2.09 \times 10^4 \pm 0.25 \times 10^4$       | $2.99 \times 10^4 \pm 0.31 \times 10^4$       |
| $K_D$ [M]          | $4.60 \times 10^{-7} \pm 4.37 \times 10^{-7}$ | $1.28 \times 10^{-6} \pm 0.19 \times 10^{-6}$ | $2.17 \times 10^{-7} \pm 1.14 \times 10^{-7}$ |
| $X_\beta$ [Å]      | $7.825 \pm 0.603$                             |                                               |                                               |



**Supplementary Video S1. The dynamics of the H84T-BanLec/SARS-CoV-2 spike protein interactions filmed with real-time high-speed AFM under physiological conditions.** The video was recorded at a scan speed of 303 ms/frame. Scan size  $100 \times 100$  nm<sup>2</sup>.
